# Supplementary material for: The genomic landscape of TERT promoter wildtype-IDH wildtype glioblastoma
Source: PubMed Central journal article supplement (PMC5970234; doi:10.1038/s41467-018-04448-6), 2018-05-25
Supplement: 41467_2018_4448_MOESM3_ESM.pdf [file 41467_2018_4448_MOESM3_ESM.pdf]

## Description of Additional Supplementary Files

File Name: Supplementary Data 1

Description: Clinical information for discovery and validation cohorts

File Name: Supplementary Data 2

Description: Summary of molecular markers

File Name: Supplementary Data 3

Description: Whole exome sequencing information

File Name: Supplementary Data 4

Description: Summary of the somatic coding mutations (by WES) in the discovery cohort of *TERT*<sup>WT</sup>-*IDH*<sup>WT</sup> gliomas (n=25)

File Name: Supplementary Data 5

Description: Summary of the copy number alterations (by WES) in the discovery cohort of *TERT*<sup>WT</sup>-*IDH*<sup>WT</sup> gliomas (n=25)

File Name: Supplementary Data 6

Description: Significantly mutated genes from discovery cohort WES, IntOgen analysis

File Name: Supplementary Data 7

Description: Whole genome sequencing information (n=9)

File Name: Supplementary Data 8

Description: Summary of the somatic coding mutations (by WGS) in the discovery cohort of *TERT*<sup>WT</sup>-*IDH*<sup>WT</sup> gliomas (n=9)

File Name: Supplementary Data 9

Description: Summary of the somatic copy number variants (CNV by WGS) in the discovery cohort of *TERT*<sup>WT</sup>-*IDH*<sup>WT</sup> gliomas (n=9)

File Name: Supplementary Data 10

Description: Summary of the somatic structural variants (SV by WGS) in the discovery cohort of *TERT*<sup>WT</sup>-*IDH*<sup>WT</sup> gliomas (n=9)

File Name: Supplementary Data 11

Description: CRISPR/Cas9 sgRNAs, cloning oligos, and Surveyor primers

File Name: Supplementary Data 12

Description: SMARCAL1 knockout isogenic cell lines generated by CRISPR/Cas9 gene editing

File Name: Supplementary Data 13

Description: PCR programs used in study

File Name: Supplementary Data 14

Description: Primers used in this study
