# Supplementary material for: The genomic landscape of TERT promoter wildtype-IDH wildtype glioblastoma
Source: Nat Commun. 2018 May 25;9:2087. doi: 10.1038/s41467-018-04448-6 (PMC5970234; doi:10.1038/s41467-018-04448-6)
Supplement: Supplementary file 1 — Supplementary Information [file 41467_2018_4448_MOESM1_ESM.pdf]

## Supplementary Information

The genomic landscape of *TERT* promoter wildtype-*IDH* wildtype glioblastoma

Diplas et al.

**a**

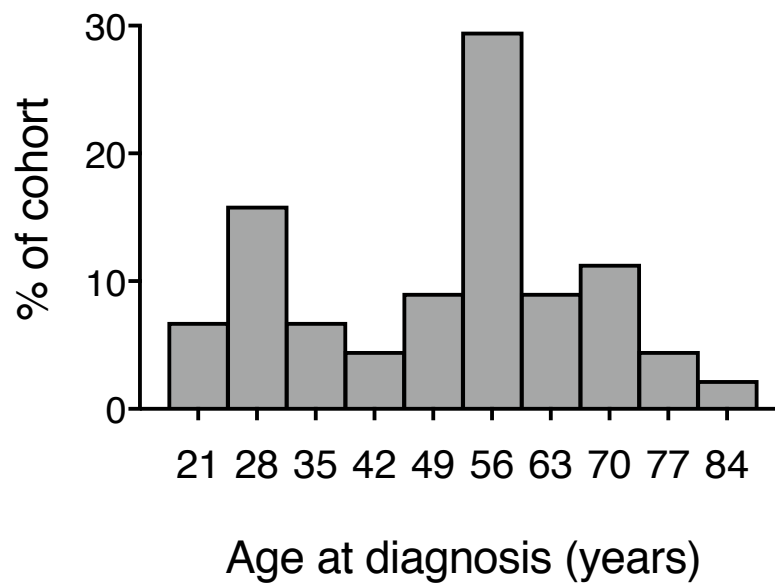

**Supplementary Figure 1. Age distribution of  $TERT^{WT}$ - $IDH^{WT}$  glioblastoma patients.** a, The distribution of patient age for the  $TERT^{WT}$ - $IDH^{WT}$  glioma cohort is shown as a percentage of the entire group. Two modes are identified in the cohort, one at 28 years, the other at 56 years of age (N=44).

**a**

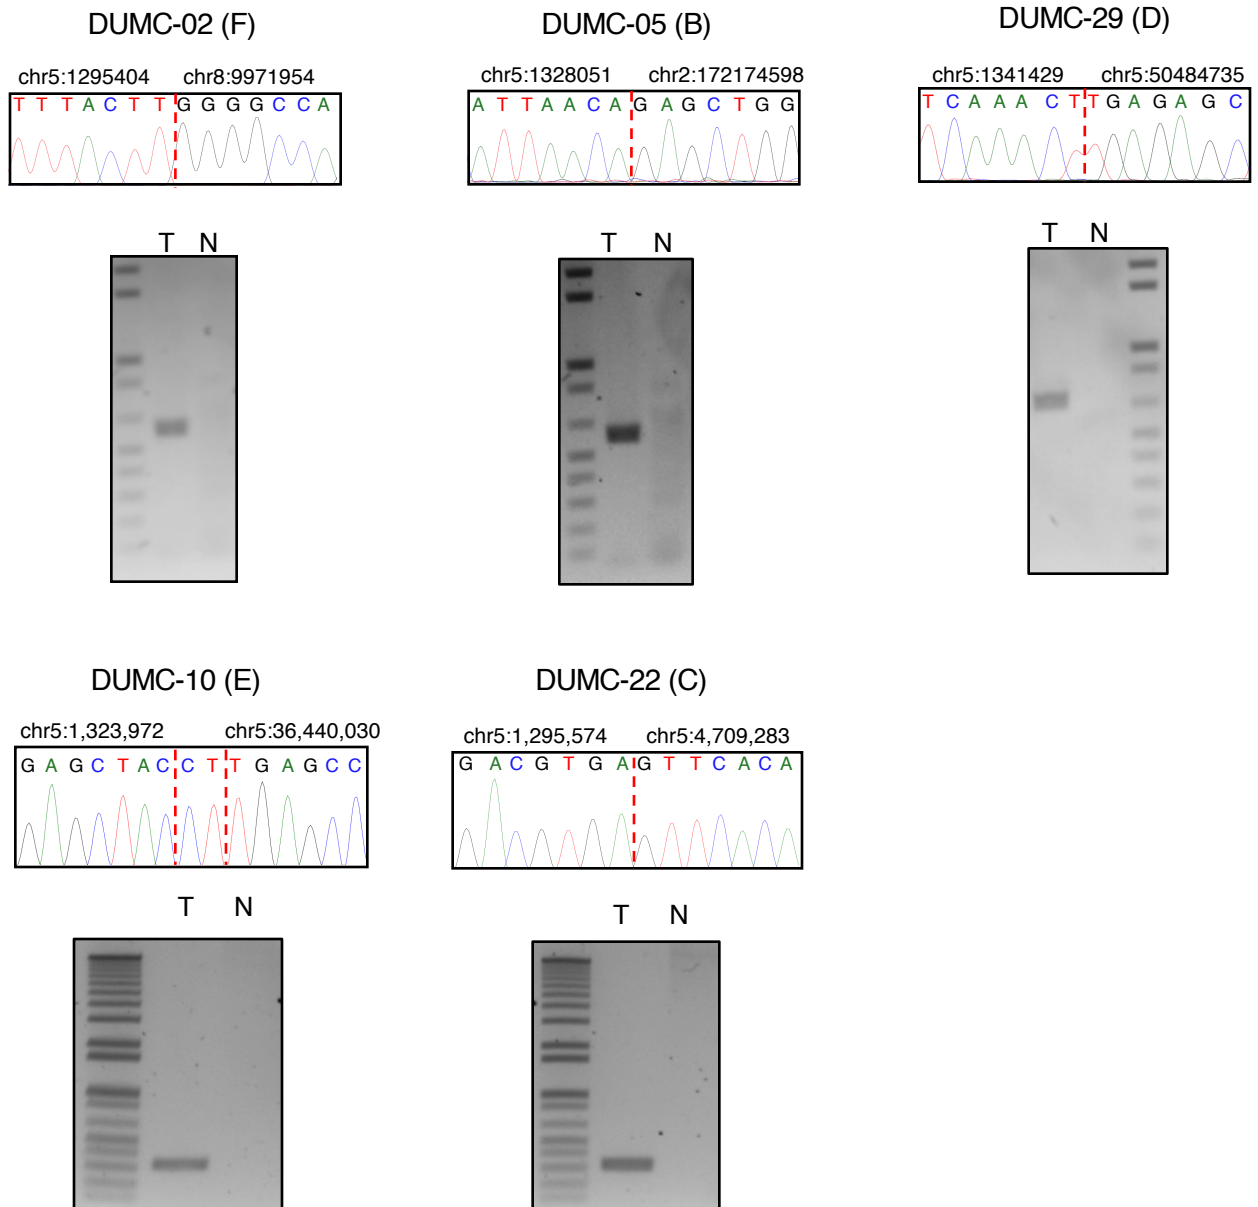

**Supplementary Figure 2. Breakpoint-spanning PCR and sequencing confirms *TERT* rearrangements.** a, Whole genome sequencing data was analyzed for structural variants. Rearrangements upstream of *TERT* were identified by DELLY, which also identified the corresponding breakpoint. Primers were designed spanning the breakpoints and PCR was performed to confirm the somatic nature of these breakpoints (T: Tumor and N: Normal gDNA from blood for the same patient).

**a**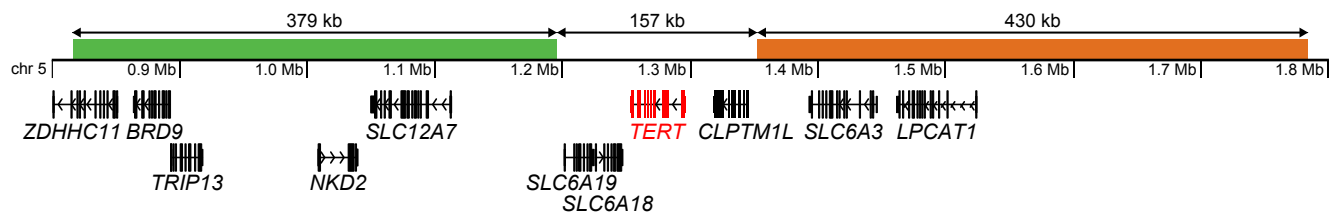**b*****TERT* rearranged GBMs**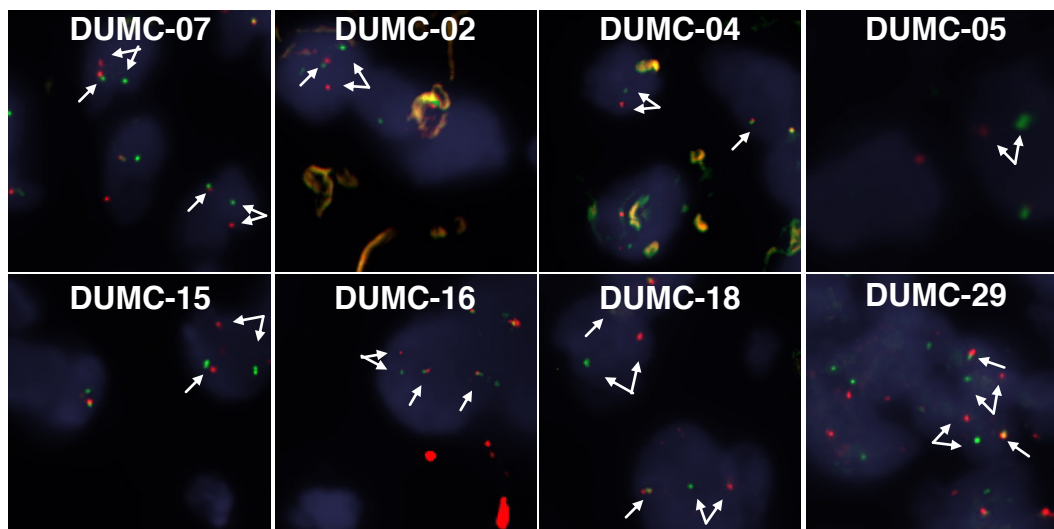***TERT* wildtype GBMs**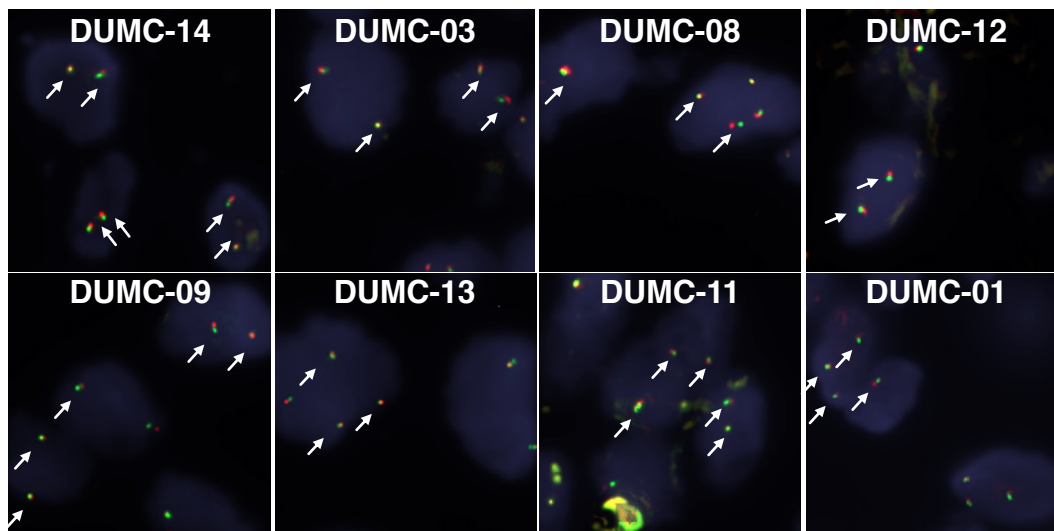

**Supplementary Figure 3. Break-apart FISH spanning *TERT* identifies recurrent *TERT* rearrangements in *TERT*<sup>WT</sup>-*IDH*<sup>WT</sup> GBM.** **a**, Break-point spanning FISH probes were designed to readily detect structural variants upstream of *TERT* where we initially identified these events by whole genome sequencing. **b**, Break-apart FISH was performed on FFPE tissue isolated from the GBM patient tumor samples. Representative images from 8 rearranged and wildtype cases are shown. Double arrows point to break apart signals, single arrows point to fusion signals.

**a**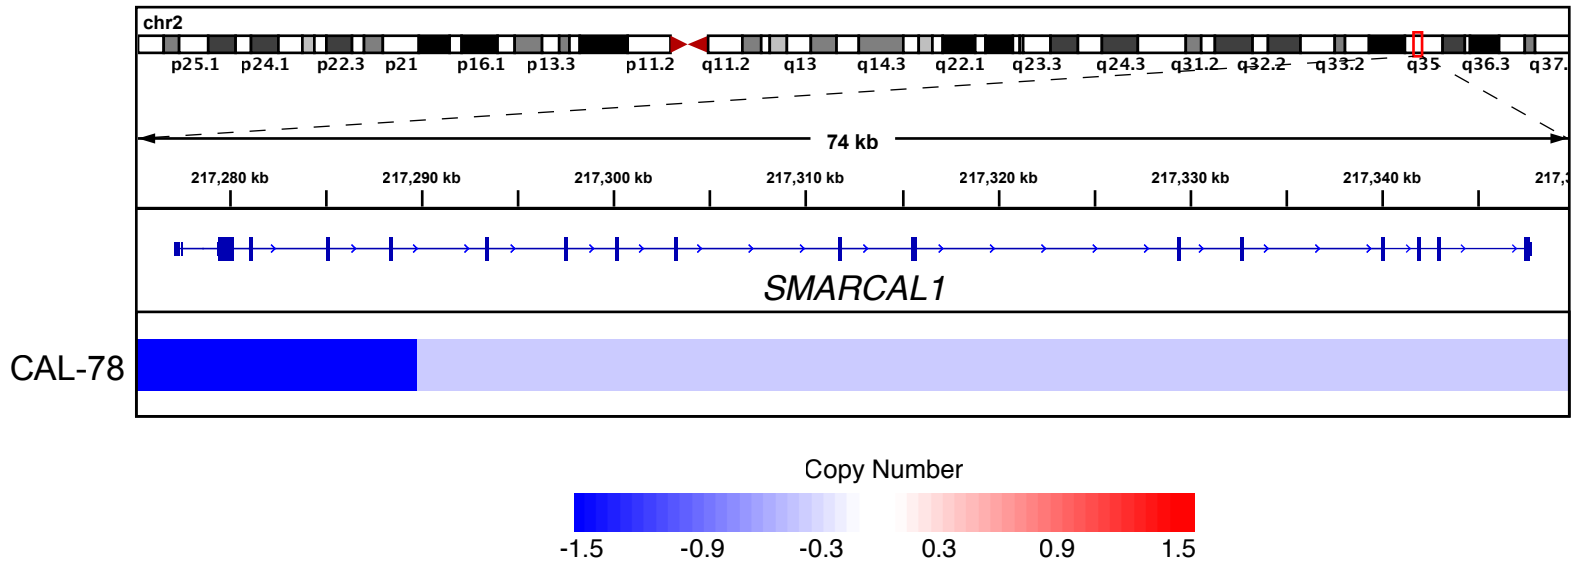**b**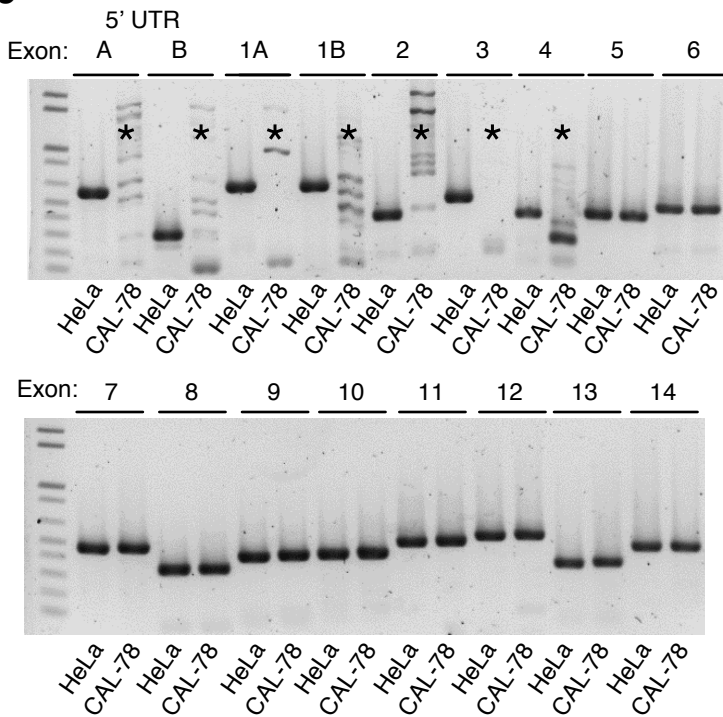**c**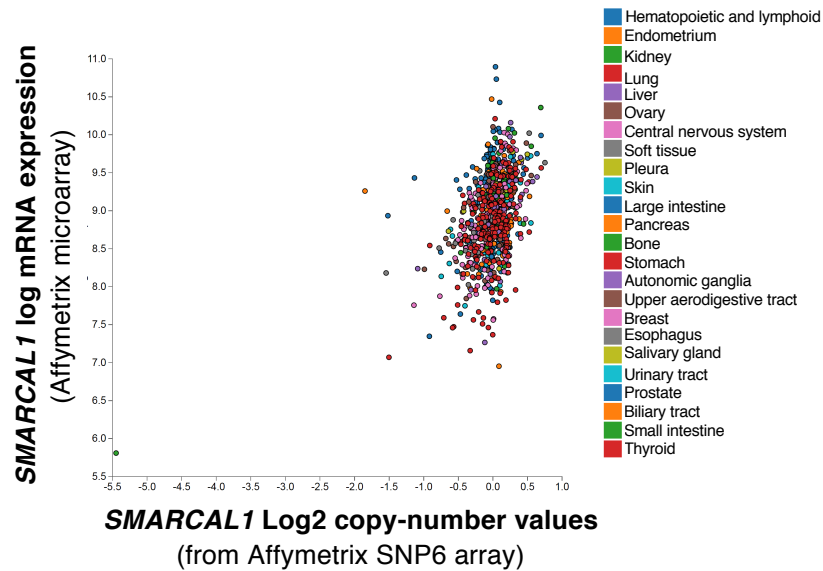**d**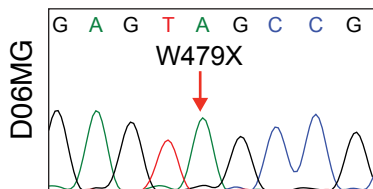

**Supplementary Figure 4. CAL-78 and D06MG are cell lines with mutations in *SMARCAL1*.** **a**, The CCLE database was examined for cell lines harboring mutations in *SMARCAL1*. We identified CAL-78, a chondrosarcoma line known to be ALT positive with intact ATRX expression. Based on Affymetrix SNP6 array data, a homozygous deletion was identified spanning exons 1-4 of *SMARCAL1*. **b**, We validated the deletion of exons 1-4 in CAL-78 (including the 5'UTR) by PCR and Sanger sequencing, using HeLa as a control. **c**, Compared to other cell lines, CAL-78 shows both deletion and absent mRNA expression of *SMARCAL1*. **d**, Sanger sequencing of the D06MG cell line reveals a homozygous W479X mutation in *SMARCAL1*.

**a**

D06MG

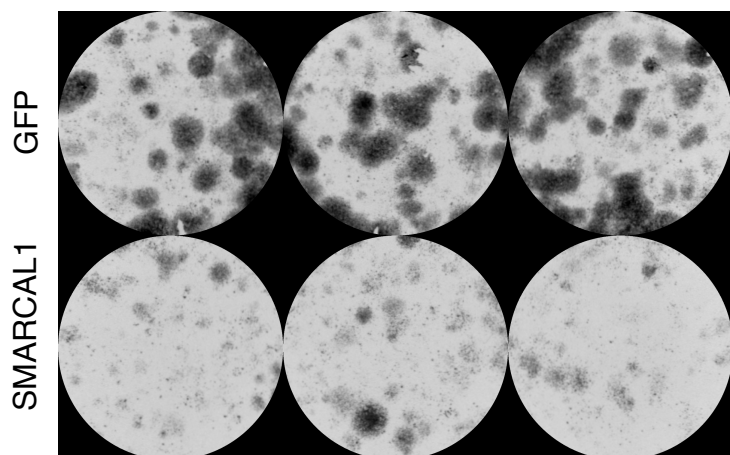

CAL-78

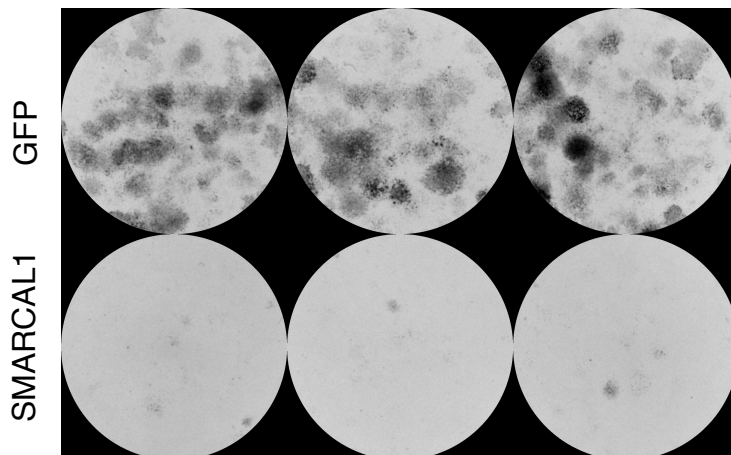**b**

D06MG

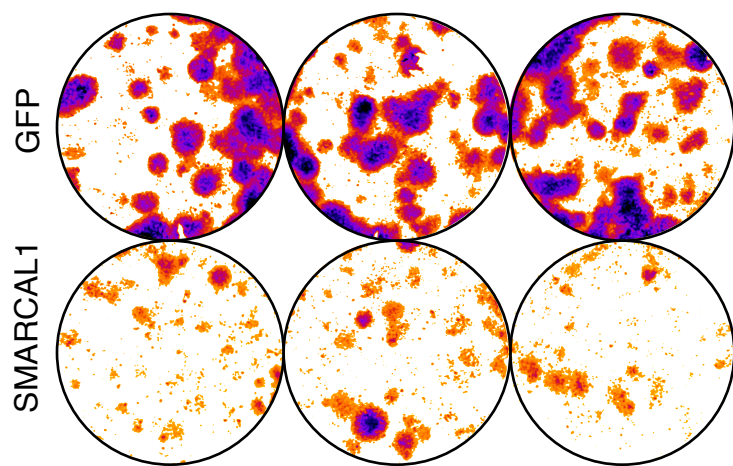

CAL-78

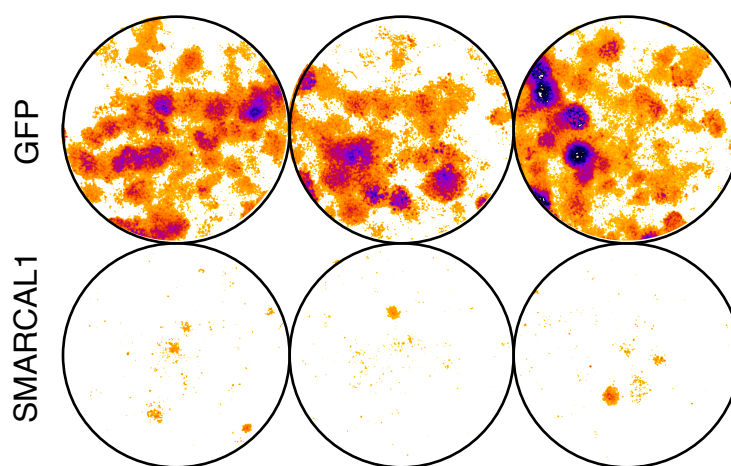**c**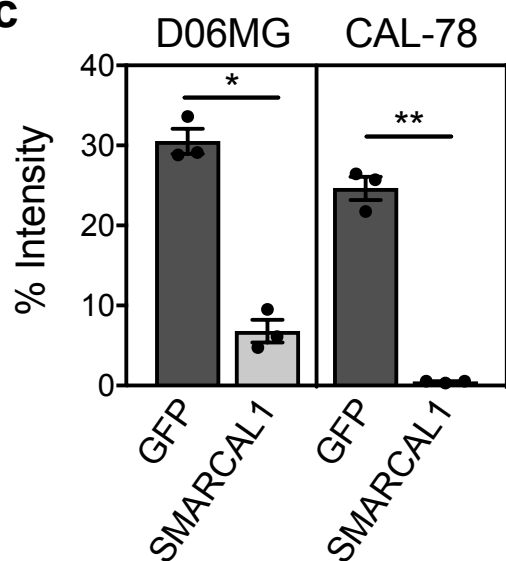

**Supplementary Figure 5. Rescue of *SMARCAL1* expression in CAL-78 and D06MG inhibits colony formation.** We rescued expression of wildtype *SMARCAL1* in **a**, D06MG and **b**, CAL-78. The top images are black and white images of the colony formation result after crystal violet staining. The bottom image is after thresholding to show differences in area and intensity. **c**, There was a significant reduction in the colony area and intensity for D06MG ( $P < 0.05$ ) and CAL-78 ( $P < 0.005$ ) in the *SMARCAL1* rescue as compared to the control (GFP). Error bars in **c** denote s.e.m. \* $P < 0.05$ ; \*\* $P < 0.05$ ; Paired t-test.

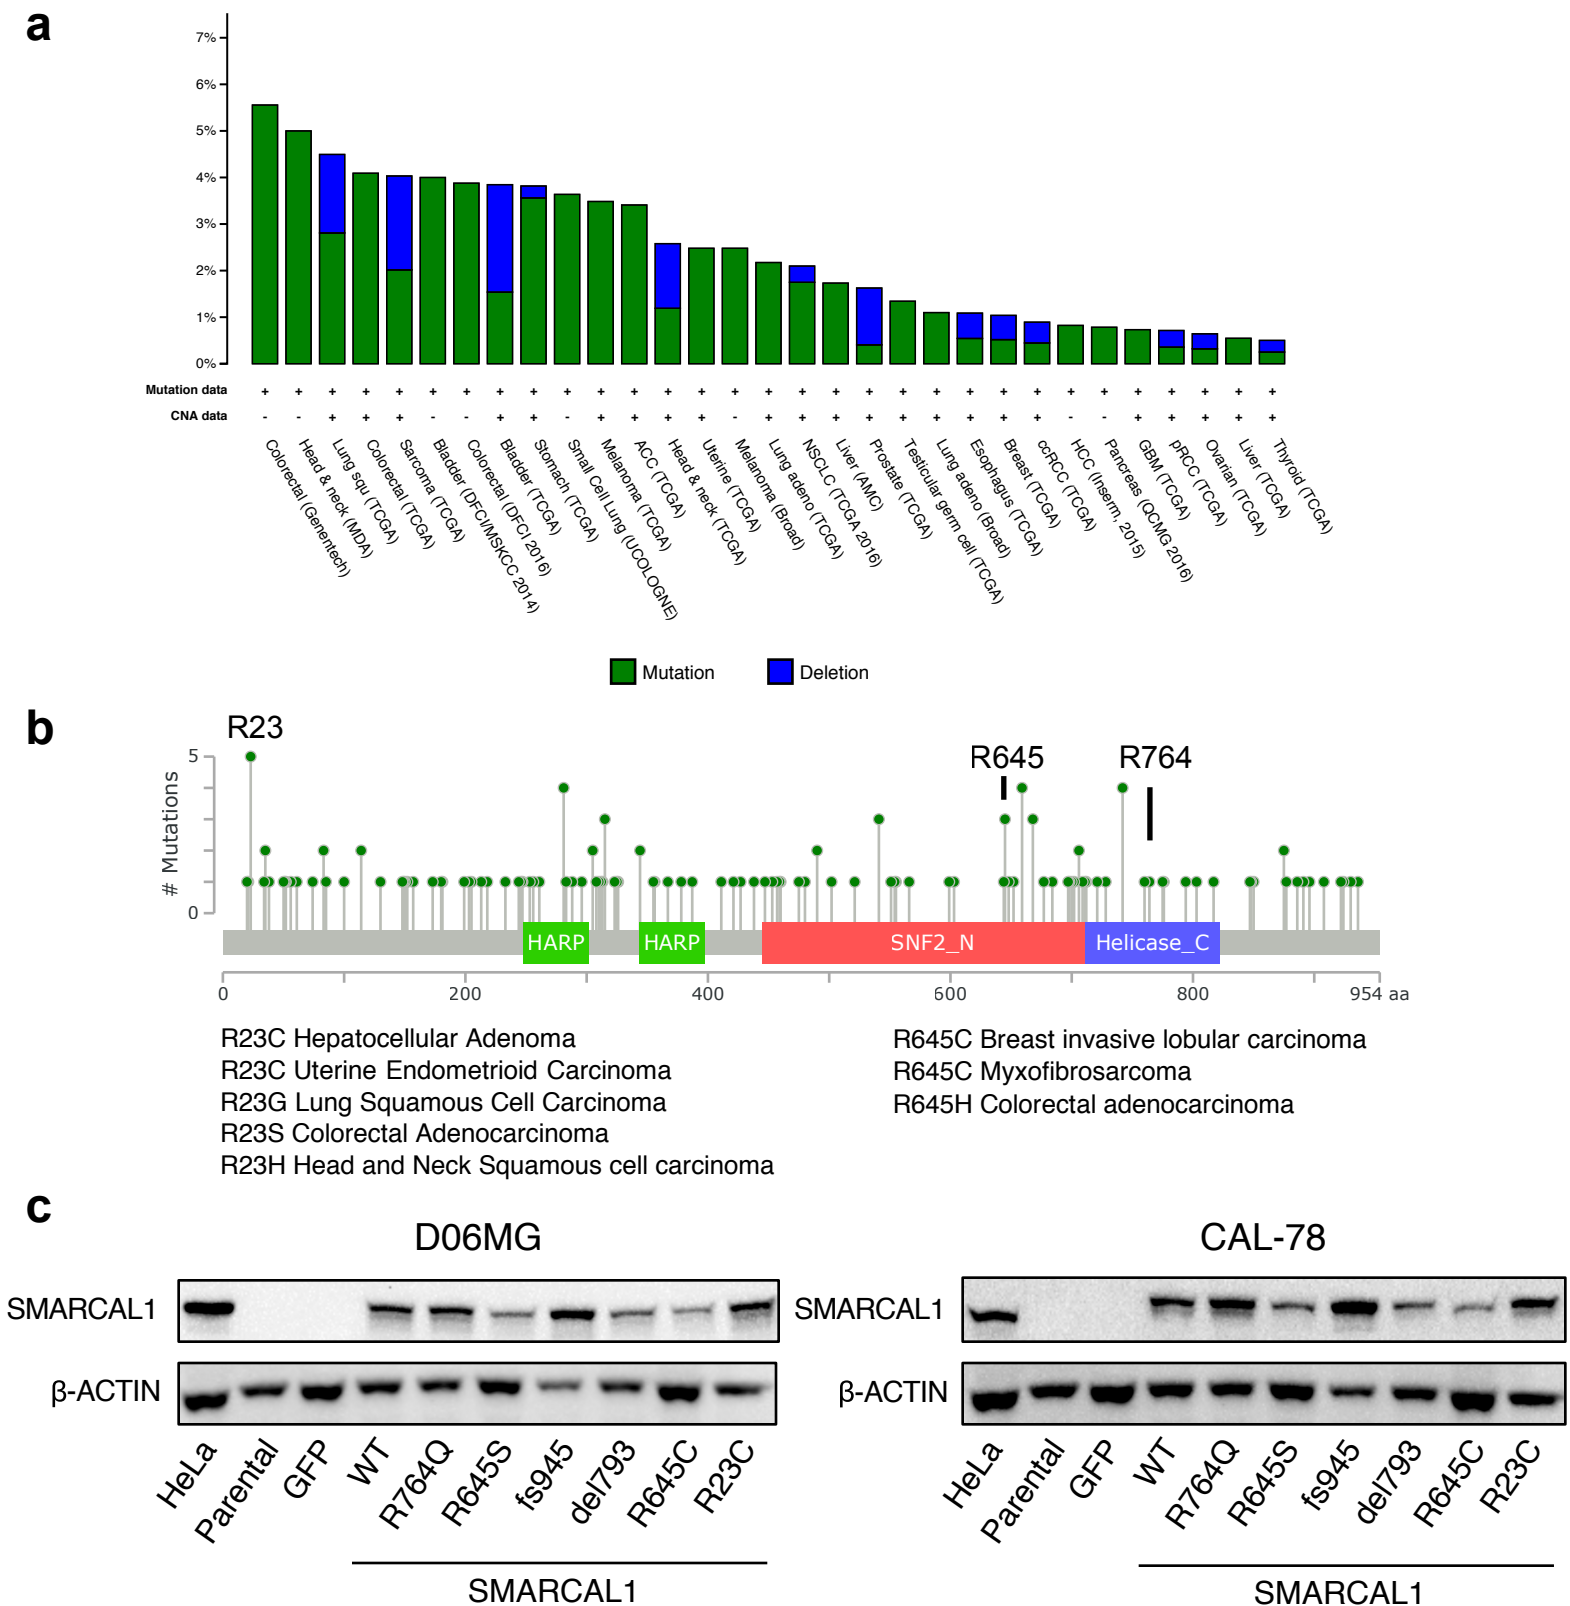

**Supplementary Figure 6. Lentiviral-mediated delivery of mutagenized constructs of SMARCAL1 in two ALT-positive lines lacking SMARCAL1 expression.** **a**, We examined pan-cancer data (cBioportal) for mutations and homozygous deletions. **b**, Recurrently-mutated loci included R23 and a cluster in the SNF2 helicase domain at R645. R23C is located in the RPA-binding domain and forms hydrogen bonds with RPA. R645C is in the ATP-binding helicase domain (also SNF2 N-terminal domain and putative nuclear localization signal domain) and is a known alteration in SIOD. Additionally, from our validation cohort, we identified ALT-positive cases with R645S, del793 and fs945 mutations. **c**, Mutagenized constructs with each of these variants were generated and delivered by lentivirus for constitutive expression in D06MG and CAL-78. Western blot analysis shows that the constructs are expressed at similar levels in these cell lines and similar to a control cell line (HeLa).

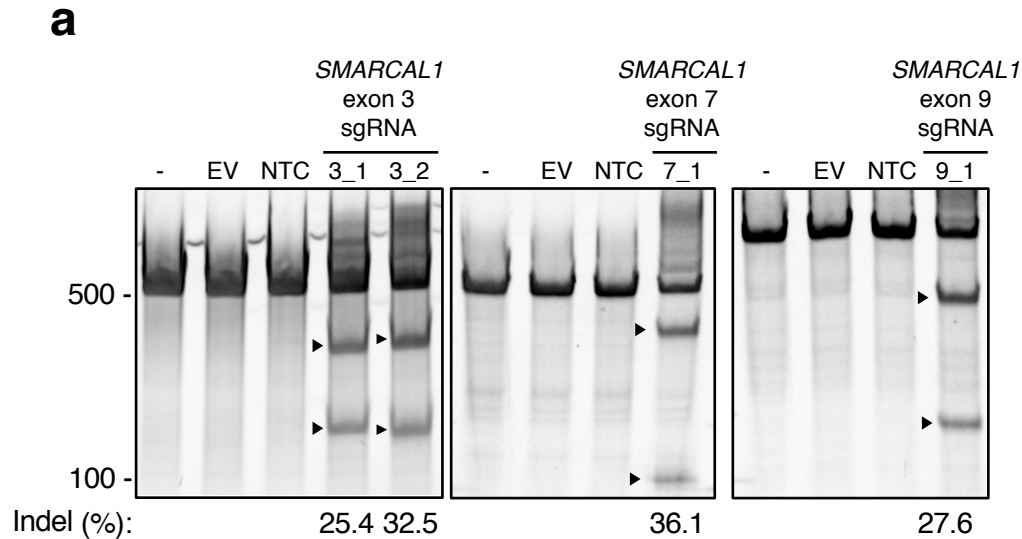

**b**

|           |              |           |                | Number of single cell clones: |                            |                    |
|-----------|--------------|-----------|----------------|-------------------------------|----------------------------|--------------------|
| Cell line | Guide Set    |           | Targeted exons | Screened                      | Harboring deletion product | Validated knockout |
| U87       | sgSMARCAL1 A | 3_2 + 9_1 | 3 and 9        | 83                            | 12                         | 2                  |
|           | sgSMARCAL1 B | 3_1 + 7_1 | 3 and 7        | 90                            | 16                         | 9                  |
| U251      | sgSMARCAL1 A | 3_2 + 9_1 | 3 and 9        | 93                            | 7                          | 5                  |
|           | sgSMARCAL1 B | 3_1 + 7_1 | 3 and 7        | 93                            | 22                         | 7                  |

**Supplementary Figure 7. Generation of *SMARCAL1* knockout glioblastoma cell lines using CRISPR/Cas9-mediated gene editing.** **a**, Guides were designed to target the coding region of *SMARCAL1* with low off-targets and high cutting efficiency. The guides were tested using the Surveyor nuclease assay after transfecting HEK293FT cells with pX458 (spCas9) and the relevant sgRNA. All guides readily introduced indels (>20%). **b**, Two guide combinations (A: 3\_2 + 9\_1 and B: 3\_1 + 7\_1) were delivered to U87MG and U251MG. After transfection, cells were GFP-sorted and single-cell cloned and expanded. Deletion-spanning qPCR was performed to readily identify clones with allele deletion in *SMARCAL1*. These lines were then sequenced and validated as isogenic knockout lines by Western blot. Overall, more than ten isogenic *SMARCAL1* knockout lines were generated in both U87 (11 total) and U251 (12 total). Clone c69\* was excluded from further analysis due to the presence of a faint band by immunoblot.

a

| TCGA ID         | Cancer Type         | Mutation            | Mutation Type | CNV Status          | Mutant Allele Fraction |
|-----------------|---------------------|---------------------|---------------|---------------------|------------------------|
| TCGA-QC-A6FX-01 | Soft tissue sarcoma | T724M               | Missense      | Shallow Deletion    | 17.0%                  |
| TCGA-DX-AB32-01 | Soft tissue sarcoma | R645C               | Missense      | Shallow Deletion    | 40.0%                  |
| TCGA-JV-A5VF-01 | Soft tissue sarcoma | E803G               | Missense      | Shallow Deletion    | 59.0%                  |
| TCGA-QQ-A5VB-01 | Soft tissue sarcoma | K875R               | Missense      | Shallow Deletion    | 63.0%                  |
| TCGA-IW-A3M6-01 | Soft tissue sarcoma | Q145*               | Nonsense      | Shallow Deletion    | 66.0%                  |
| TCGA-DX-A3U7-01 | Soft tissue sarcoma | Homozygous Deletion |               | Homozygous Deletion |                        |
| TCGA-DX-AB2F-01 | Soft tissue sarcoma | Homozygous Deletion |               | Homozygous Deletion |                        |
| TCGA-DX-AB2P-01 | Soft tissue sarcoma | Homozygous Deletion |               | Homozygous Deletion |                        |
| TCGA-WK-A8XX-01 | Soft tissue sarcoma | Homozygous Deletion |               | Homozygous Deletion |                        |
| TCGA-X6-A8C2-01 | Soft tissue sarcoma | Homozygous Deletion |               | Homozygous Deletion |                        |

**Supplementary Figure 8. *SMARCA1* mutations are present in soft tissue sarcoma.** a, We examined a recent TCGA sequencing study on many sarcoma subtypes and found several homozygous deletions and potentially inactivating variants, as many had concurrent shallow deletion and mutations present in the helicase domains.

**a**

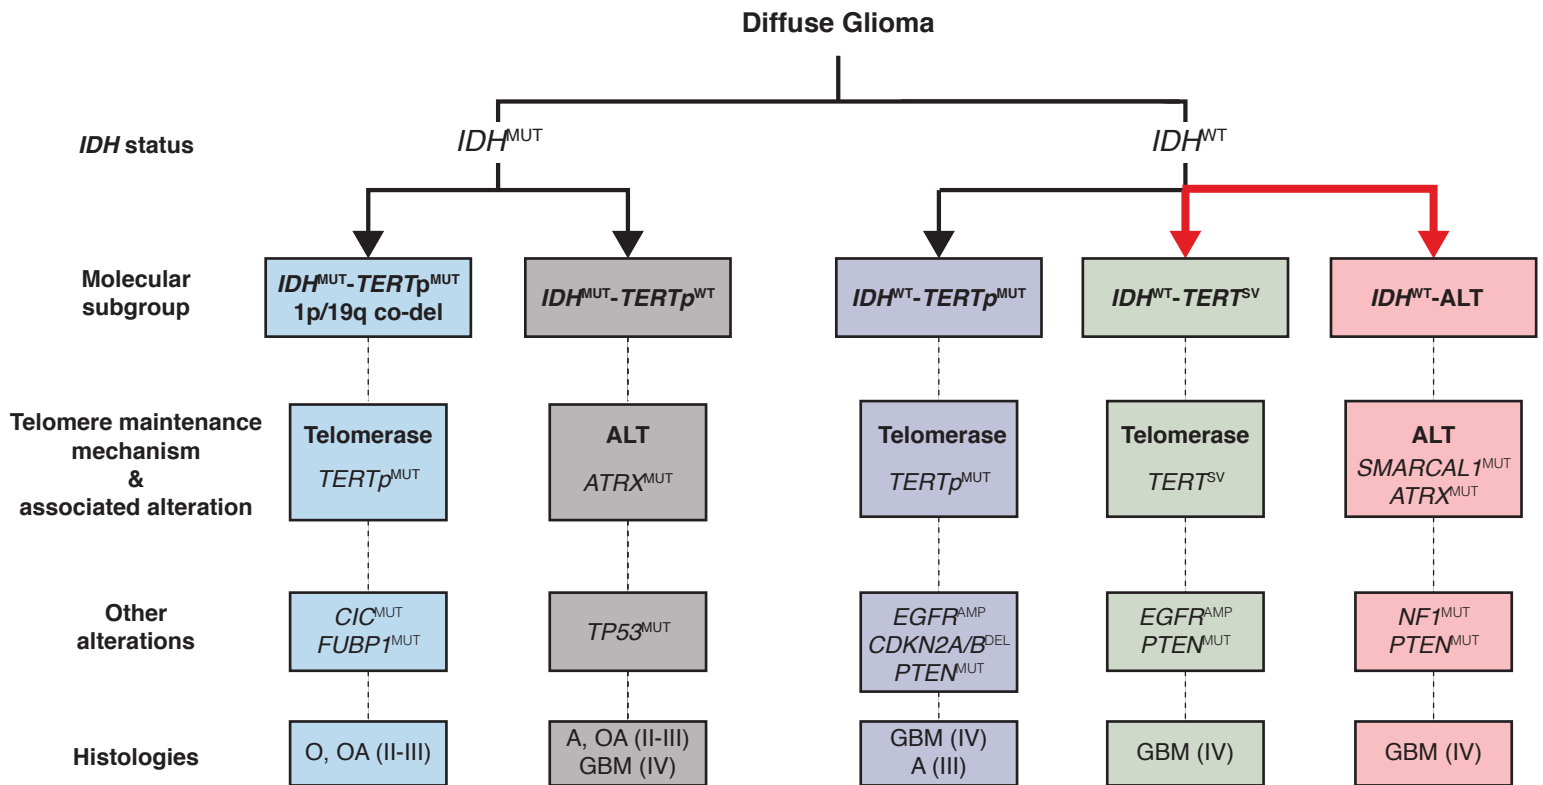

**Supplementary Figure 9. Novel genetic subtypes of GBM in the overall molecular classification of adult diffuse glioma. a,** The molecular subtypes of GBM are outlined, stratified first by *IDH* status, then by markers including *TERT*<sub>p</sub> mutation, 1p/19q co-deletion, and now *TERT* rearrangement (*IDH*<sup>WT</sup>-*TERT*<sup>SV</sup>) and *SMARCA1* or *ATRX* mutation (*IDH*<sup>WT</sup>-ALT). The two new genetic subtypes of GBM, *IDH*<sup>WT</sup>-*TERT*<sup>SV</sup> and *IDH*<sup>WT</sup>-ALT (red arrows), have novel genetic alterations associated with telomere maintenance.

**a**

anti-ATRAX

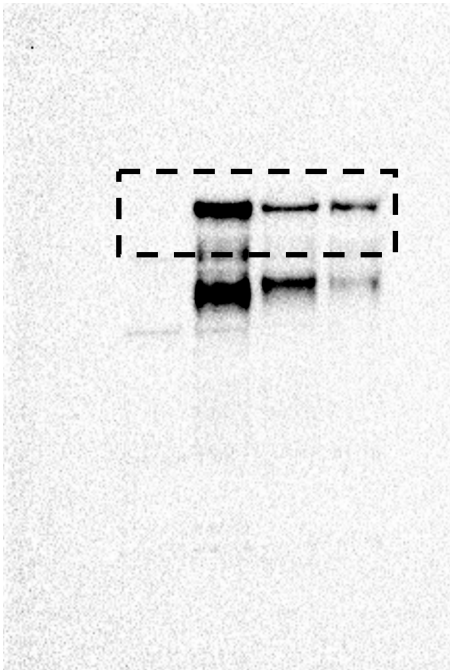

anti-DAXX

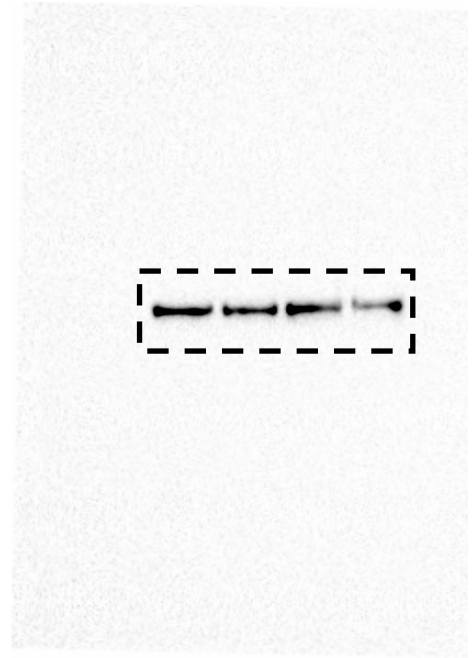

anti-SMARCAL1

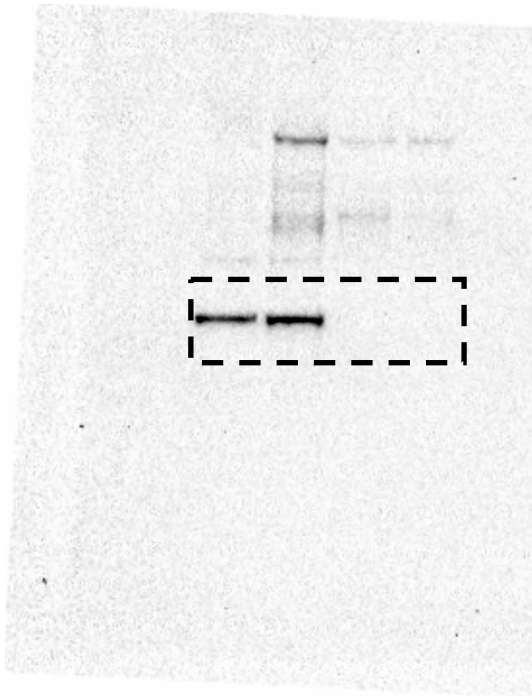

anti-GAPDH

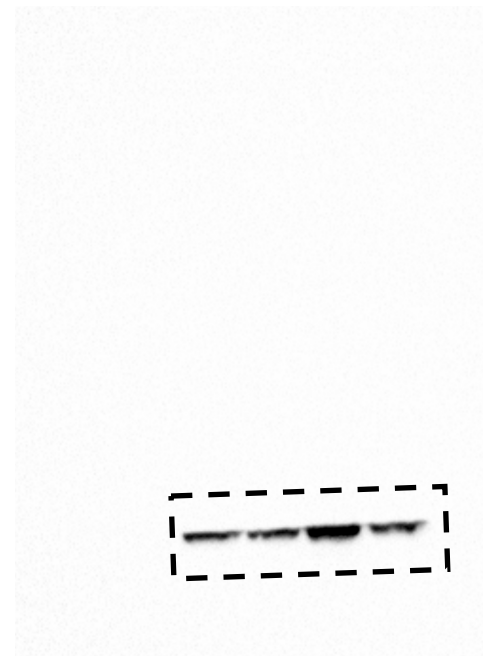

**Supplementary Figure 10. Original western blots for examining SMARCAL1 expression in mutant cell lines.** **a**, Shown are the original blots for ATRX, DAXX, SMARCAL1, and GAPDH expression in HeLa, U2-OS, D06MG, and CAL-78. The images are cropped on the right side as unrelated samples were run on the same gel.

**a**

U251MG, anti-SMARCAL1

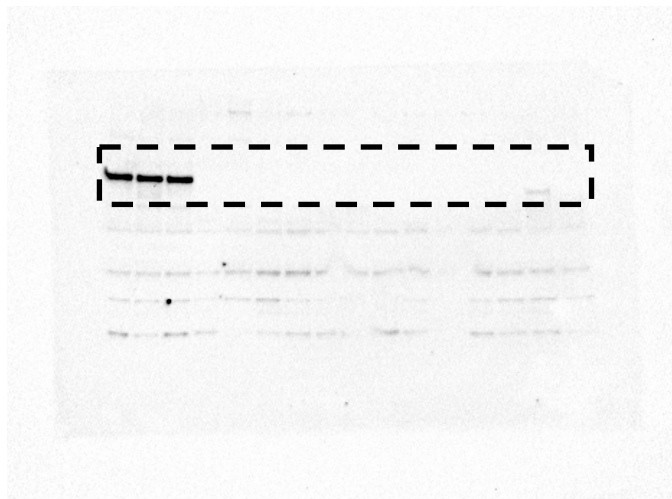

U251MG, anti-GAPDH

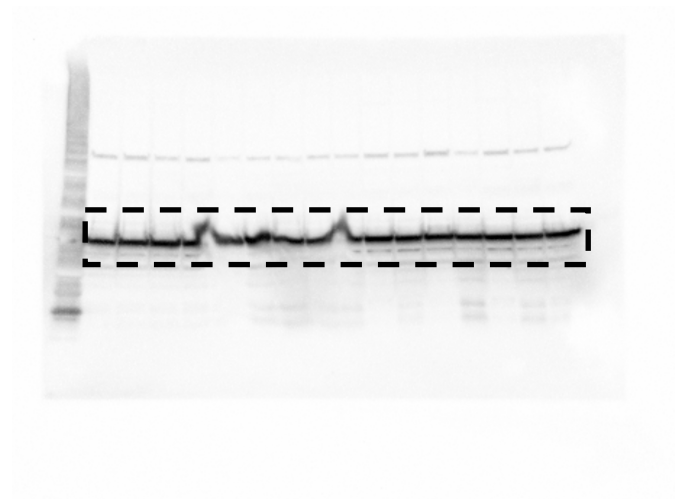

U87MG, anti-SMARCAL1

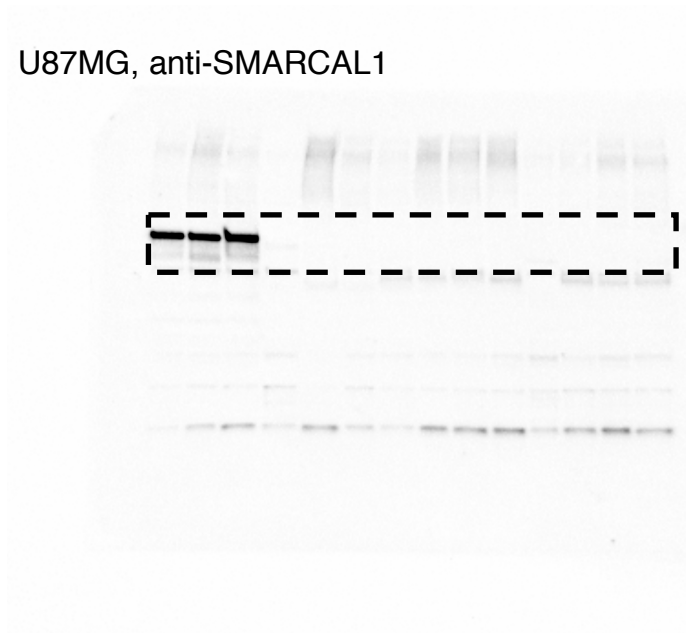

U87MG, anti-GAPDH

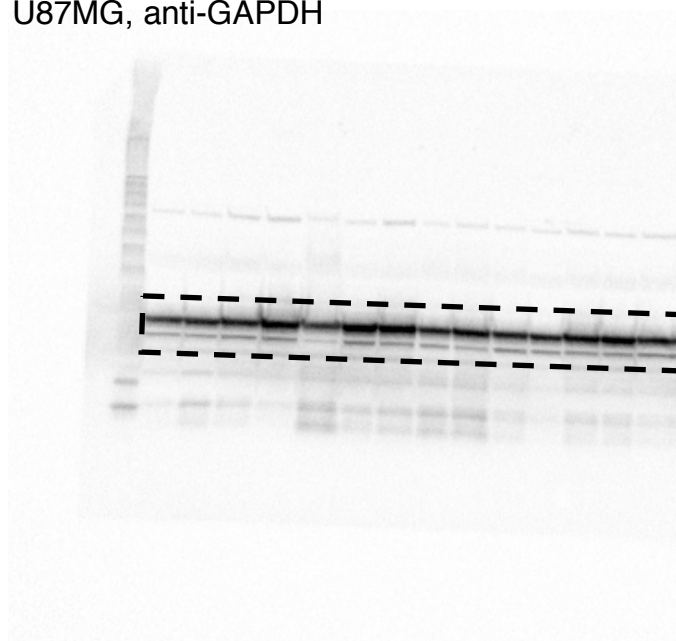

**Supplementary Figure 11. Original western blots for SMARCAL1 expression in isogenic knockout cell lines. a,** Shown are the original blots for SMARCAL1 and GAPDH expression in U87MG and U251MG *SMARCAL1* knockouts. The images for U87MG is cropped on the right side as unrelated samples were run on the same gel.
